# Supplementary material
Source: ML conference proceedings conference paper supplement (https://openreview.net/forum?id=VDZcB9wl8m)

#Nodos = 10 | #DAGs = 10

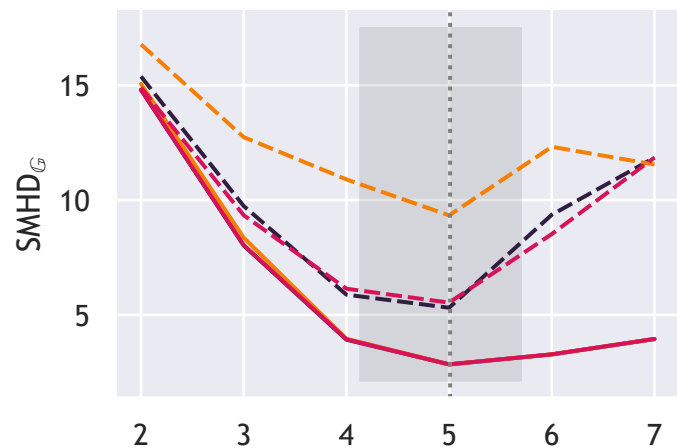

#Nodos = 10 | #DAGs = 30

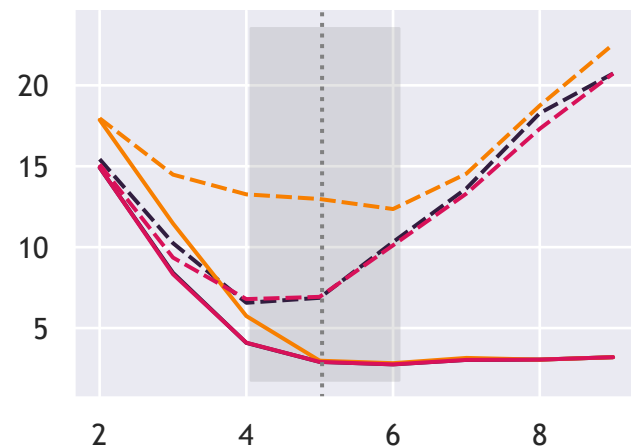

#Nodos = 10 | #DAGs = 50

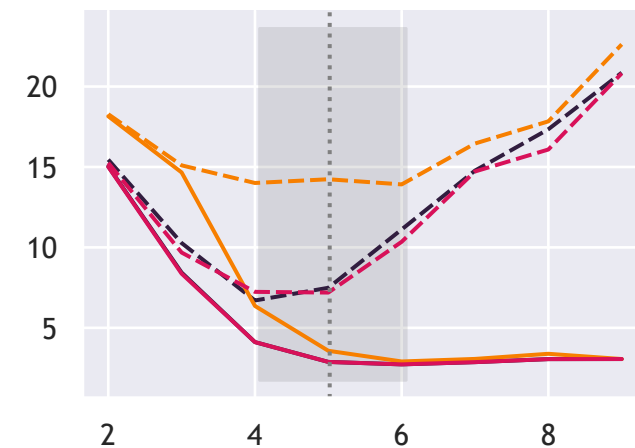

#Nodos = 30 | #DAGs = 10

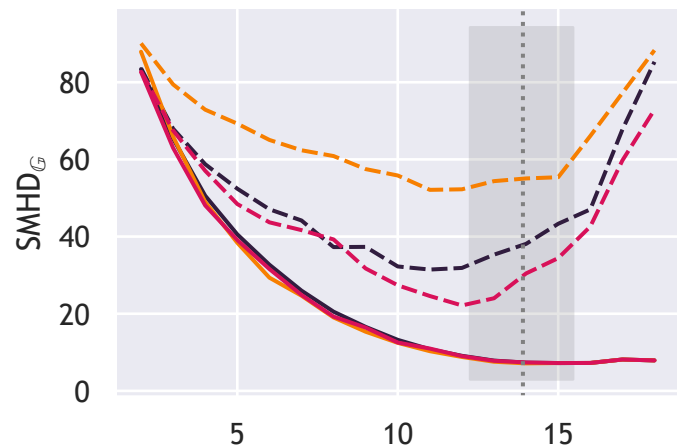

#Nodos = 30 | #DAGs = 30

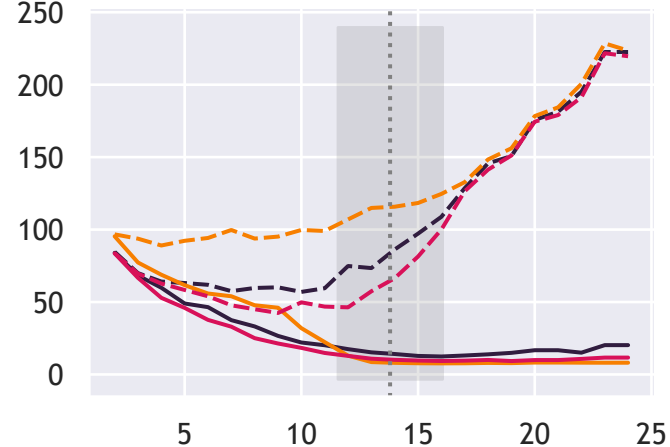

#Nodos = 30 | #DAGs = 50

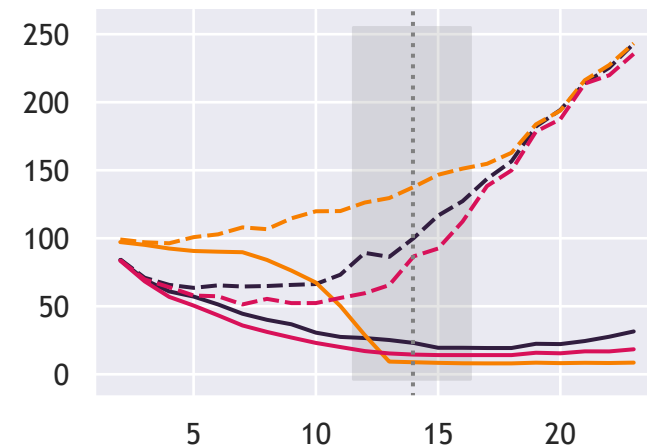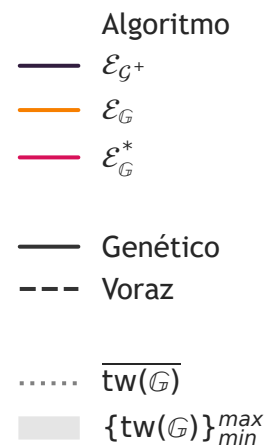

#Nodos = 50 | #DAGs = 10

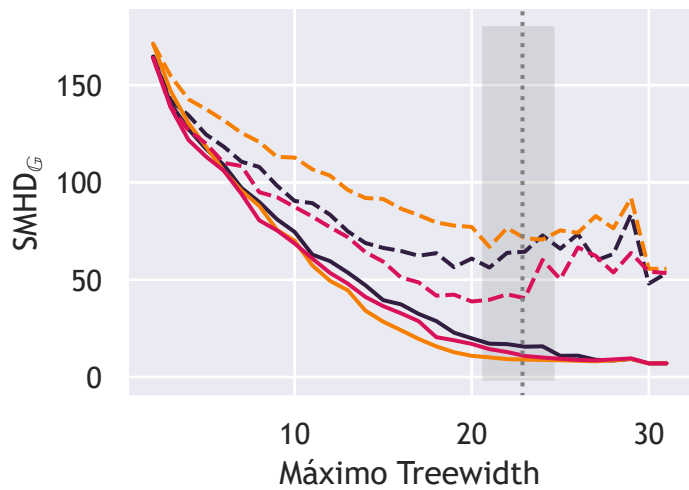

#Nodos = 50 | #DAGs = 30

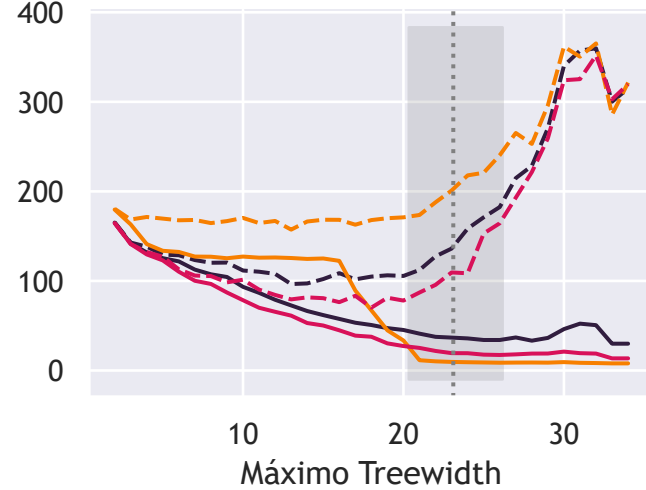

#Nodos = 50 | #DAGs = 50

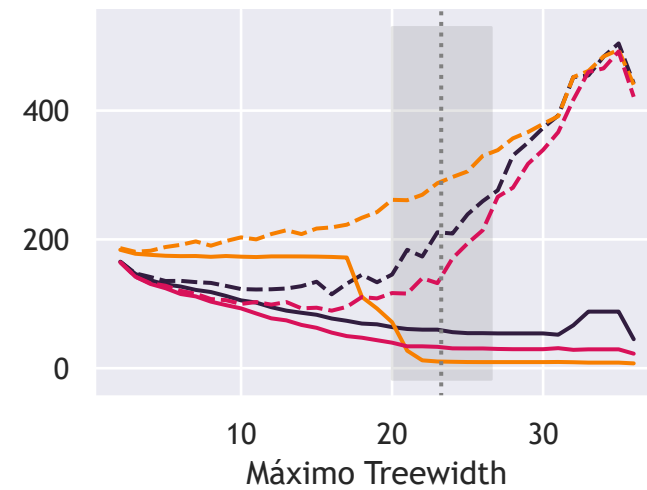

Supplement: supplementary_material [file attachment]
